# Supplementary material for: Virtual Care and Emergency Department Use During the COVID-19 Pandemic Among Patients of Family Physicians in Ontario, Canada
Source: PubMed Central journal article supplement (PMC10148195; doi:10.1001/jamanetworkopen.2023.9602), 2023-04-28
Supplement: jamanetwopen-e239602-s001.pdf [file jamanetwopen-e239602-s001.pdf]

## Supplemental Online Content

Kiran T, Green ME, Strauss R, et al. Virtual care and emergency department use during the COVID-19 pandemic among patients of family physicians in Ontario, Canada. *JAMA Network Open*. 2023;6(4):e239602. doi:10.1001/jamanetworkopen.2023.9602

**eAppendix 1.** Billing Codes Used to Determine the Usual Family Physician for Not Enrolled Patients

**eAppendix 2.** Description of Ontario Health Administrative Databases and the Variables Included in This Study

**eAppendix 3.** Ambulatory Care Sensitive Condition Related Hospital Admissions Used as Secondary Outcomes to Examine Healthcare Utilization of Patients Attached to Family Physicians Within Each Stratum of Virtual Care Use

**eAppendix 4.** Model Selection and Fit

**eAppendix 5.** Patient Characteristics by the Percent of Physician Primary Care Provided Virtually, Between February 1 and October 31, 2021, in Ontario, Canada

**eAppendix 6.** Weekly Emergency Department Visits by Canadian Triage and Acuity Scale (CTAS) Level, January 2019 to October 2021

**eAppendix 7.** Number of ED Visits per 1000 Patients by Rostered Physician's Ratio of Virtual Visit

**eAppendix 8.** Patient Health Service Utilization Stratified by the Attached Physician's Percent of Care Provided Virtually, Between February 1 and October 2021, in Ontario Canada, by Rurality

**eAppendix 9.** Physician and Practice Characteristics by the Percent of Care Provided Virtually, Comprehensive Family Physicians, Between February 1 and October 31, 2021, in Ontario, Canada

**eAppendix 10.** Characteristics of Patients Attached to Comprehensive Family Physicians by the Percent of Physician Primary Care Provided Virtually, Between February 1 and October 31, 2021, in Ontario, Canada

**eAppendix 11.** Health Service Utilization of Patients Attached to Comprehensive Family Physicians Stratified by the Attached Physician's Percent of Care Provided Virtually, Between February 1 and October 2021, in Ontario Canada

This supplemental material has been provided by the authors to give readers additional information about their work.

**eAppendix 1.** Billing Codes Used to Determine the Usual Family Physician for Not Enrolled Patients.

| Fee code           | Description                                                               |
|--------------------|---------------------------------------------------------------------------|
| Primary Care Codes |                                                                           |
| A001               | MINOR ASSESS.-F.P./G.P.                                                   |
| A002               | Family Practice & Practice in General - Enhanced 18 month well baby visit |
| A003               | GEN. ASSESS. -F.P./G.P.                                                   |
| A007               | INTERMED.ASSESS/WELL BABY CARE-F.P./G.P./PAED.                            |
| A903               | GEN/FAM PRACT-PRE-DENTAL/OPER.ASSESS LIMIT 2 PER YEAR/PT                  |
| E075               | GERIATRIC GENERAL ASSESSMENT PREMIUM                                      |
| G212               | D./T. PROC.-ALLERGY-HYPOSENSITIZATION INJECTION PLUS BASIC                |
| G271               | D./T. PROC.-CARDIOV.-ANTICOAGULANT SUPERVISION                            |
| G372               | D./T. PROC.-INJECTIONS-INTRADERMAL/MUSCULAR ETC. EA. ADD.                 |
| G373               | D./T. PROC.-INJ. INTRADERMAL/MUSC. BASIC FEE (SHICK TEST)                 |
| G365               | D./T. PROC.-GYNAECOLOGY-PAPANICOLAOU SMEAR                                |
| G538               | D&T IMMUNIZATION-WITH VISIT, EACH INJECT.                                 |
| G539               | Injection of unspecified agent - sole reason (first injection)            |
| G590               | INFLUENZA AGENT +VISIT                                                    |
| G591               | Injection of influenza agent - sole reason                                |
| K005               | INDIVIDUAL CARE PER 1/2 HR                                                |
| K013               | COUNSELLING-ONE OR MORE PEOPLE-PER 1/2HR.                                 |
| K017               | ANNUAL HEALTH EXAM-CHILD AFT. 2ND BIRTHDAY.                               |
| P004               | OBS.-PRENATAL CARE-MINOR PRENATAL ASSESS.-SUBSEQ.PRENAT.VIS.              |
| K130               | Periodic health visit - adolescent                                        |
| K131               | Periodic health visit - adult aged 18 to 64 inclusive                     |
| K132               | Periodic health visit - adult 65 years of age and older                   |
| K030               | DIABETIC MANAGEMENT FEE                                                   |
| K080               | Minor assessment - Covid, Virtual                                         |
| K081               | Intermediate assessment - Covid, Virtual                                  |
| K082               | Primary mental health care - Covid, Virtual                               |
| Paediatric Codes   |                                                                           |
| A261               | MINOR ASSESS.-PAED.                                                       |
| A268               | Paediatrics - Enhanced 18 month well baby visit                           |
| K267               | ANNUAL HEALTH EXAM-CHILD-AFT. 2ND BIRTHDAY PAED.                          |
| K269               | ANNUAL HEALTH EXAM-PAEDIATRICS-ADOLESCENT-OFFICE                          |

**eAppendix 2.** Description of Ontario health administrative databases and the variables included in this study.

| <b>Dataset</b>                                       | <b>Description</b>                                                                                                                                                                                                                                                                                                                                                                          | <b>Variable(s)</b>                                                        |
|------------------------------------------------------|---------------------------------------------------------------------------------------------------------------------------------------------------------------------------------------------------------------------------------------------------------------------------------------------------------------------------------------------------------------------------------------------|---------------------------------------------------------------------------|
| National Ambulatory Care Reporting System (NACRS)    | NACRS contains clinical, demographic, and administrative information for all patient visits made to hospital- and community-based ambulatory care centres in Ontario.                                                                                                                                                                                                                       | - Emergency department visits                                             |
| Discharge Abstract Database (DAD)                    | DAD summarizes the hospital discharge information of individuals receiving inpatient care in a non-mental health designated bed. Each record contains demographic, clinical and administrative data regarding the hospitalized individual, as well as comorbidities and procedures received.                                                                                                | - Hospitalizations                                                        |
| Primary Care Population (PCPOP) Dataset              | PCPOP captures all individuals in Ontario who are alive and eligible for OHIP coverage at a given point in time. The PCPOP dataset includes basic demographic information as well as Primary Care Rostering, which represents information on which physician/group and family health team (FHT) the patient is enrolled or virtually enrolled with.                                         | - Physician model of care<br>- Physician patient panel size               |
| Ontario Health Insurance Plan (OHIP) Claims Database | OHIP Claims Database contains approved physician claims data from inpatient, outpatient and long-term care settings for physicians in Ontario. Among other information, each record identifies the physician, the patient, the diagnosis responsible for the claim, the service provided and the date of service.                                                                           | - Primary care physician visits                                           |
| Postal Code Conversion File (PCCF)                   | PCCF is prepared by Statistics Canada and links six-character postal codes to Statistics Canada's standard geographic areas for which census data and other statistics are produced, such as measures of rurality and neighbourhood income quintiles.                                                                                                                                       | - Rurality Index of Ontario (RIO)                                         |
| Registered Persons Database (RPDB)                   | RPDB provides basic demographic information for those issued an Ontario health insurance number. It also indicates the time periods for which an individual was eligible to receive publicly funded health insurance benefits and provides the best known postal code for each registrant on July 1st of each year.                                                                         | - Identification of Ontario population<br>- Patient-level characteristics |
| Corporate Provider Database (CPDB)                   | CPDB is used to pay OHIP claims. This data contains addresses, registration and program eligibility information about individual health care providers such as physicians, pharmacists, and other practitioners. This data also includes organizations such as provider groups, hospitals, independent health facilities, primary care groups, and alternate payment health care providers. | - Physician-level characteristics                                         |

**eAppendix 3.** Ambulatory Care Sensitive Condition Related Hospital Admissions Used as Secondary Outcomes to Examine Healthcare Utilization of Patients Attached to Family Physicians within Each Stratum of Virtual Care Use.

| <b>Most responsible diagnosis</b>     | <b>International classification of diseases (ICD)-10-CA<sup>a</sup> code</b>                                                                       |
|---------------------------------------|----------------------------------------------------------------------------------------------------------------------------------------------------|
| Asthma                                | J45                                                                                                                                                |
| Diabetes                              | E10.0, E10.1, E10.63, E10.64, E10.9, E11.0, E11.1, E11.63, E11.64, E11.9, E13.0, E13.1, E13.63, E13.64, E13.9, E14.0, E14.1, E14.63, E14.64, E14.9 |
| Congestive heart failure              | I50, J81                                                                                                                                           |
| Chronic obstructive pulmonary disease | J41, J42, J43, J44, J47, with CCI <sup>b</sup> exclusion 1IJ50, 1IJ76, 1HB53, 1HD53, 1HZ53, 1HB55, 1HD55, 1HZ55, 1HZ85, 1HB54, 1HD54               |

<sup>a</sup> An enhanced version of ICD-10 developed by the Canadian Institute for Health Information (CIHI) for morbidity classification in Canada

<sup>b</sup> Canadian Classification of Health Interventions

#### **eAppendix 4.** Model selection and fit

Our outcome, the count of ED visits during a period of time, was moderately overdispersed, so we chose the Negative Binomial model to account for this overdispersion. A multilevel model would have been ideal since the ratio of virtual visits is measured at the physician-level. However, due to the large number of physicians, models with random effects failed to converge. We therefore used Generalized Estimating Equations(GEE) to account for clustering within physicians, with a compound symmetric covariance structure; this would provide results that are very close to a model with random effects.

The scatter plot of predicted value versus observed value did not show a nice diagonal line at the level of each unique combination of all covariates included in the model, however, it did perfectly line up in diagonal when we aggregated the observed number of ED visits and the predicted value at each combined level of rural index and ratio of virtual visit, which are the two key factors we were interested in.

In order to reduce the effect of some high number of ED visits, we dichotomized the volume of ED visits and ran a modified Poisson regression to compare with the results to those obtained using the Negative Binomial model. Although the outcome for the two models are not exactly the same, results from the modified Poisson model showed the same pattern as those from the Negative Binomial model, i.e. the risk of visiting ED decreased as the ratio of virtual visit increased, although the difference between virtual ratio groups became smaller.

**eAppendix 5.** Patient Characteristics by the Percent of Physician Primary Care Provided Virtually, between February 1 and October 31, 2021, in Ontario, Canada.

| Characteristic, n (%)                      | Percent Virtual Care of Primary Care Physician |                |                |                  |                  |                  |               | Total            |
|--------------------------------------------|------------------------------------------------|----------------|----------------|------------------|------------------|------------------|---------------|------------------|
|                                            | 0%                                             | >0-20%         | >20-40%        | >40-60%          | >60-80%          | >80-<100         | 100%          |                  |
| <b>No.</b>                                 | N=82,689                                       | N=771,808      | N=1,633,324    | N=3,229,223      | N=4,657,341      | N=2,511,964      | N=64,714      | N=12,951,063     |
| <b>Age</b>                                 |                                                |                |                |                  |                  |                  |               |                  |
| ≤18                                        | 11,599 (14.0)                                  | 136,211 (17.6) | 307,286 (18.8) | 615,844 (19.1)   | 852,541 (18.3)   | 412,339 (16.4)   | 10,696 (16.5) | 2,346,516 (18.1) |
| 19-29                                      | 14,175 (17.1)                                  | 107,928 (14.0) | 222,336 (13.6) | 423,268 (13.1)   | 627,804 (13.5)   | 361,294 (14.4)   | 10,954 (16.9) | 1,767,759 (13.6) |
| 30-44                                      | 18,044 (21.8)                                  | 154,324 (20.0) | 319,894 (19.6) | 637,641 (19.7)   | 967,437 (20.8)   | 551,582 (22.0)   | 15,833 (24.5) | 2,664,755 (20.6) |
| 45-64                                      | 21,457 (25.9)                                  | 217,806 (28.2) | 449,237 (27.5) | 898,003 (27.8)   | 1,316,447 (28.3) | 730,943 (29.1)   | 17,145 (26.5) | 3,651,038 (28.2) |
| 65-74                                      | 8,724 (10.6)                                   | 87,499 (11.3)  | 185,928 (11.4) | 370,765 (11.5)   | 508,476 (10.9)   | 263,437 (10.5)   | 5,938 (9.2)   | 1,430,767 (11.0) |
| >75                                        | 8,690 (10.5)                                   | 68,040 (8.8)   | 148,643 (9.1)  | 283,702 (8.8)    | 384,636 (8.3)    | 192,369 (7.7)    | 4,148 (6.4)   | 1,090,228 (8.4)  |
| <b>Sex</b>                                 |                                                |                |                |                  |                  |                  |               |                  |
| Female                                     | 37,134 (44.9)                                  | 375,362 (48.6) | 820,252 (50.2) | 1,669,636 (51.7) | 2,470,394 (53.0) | 1,307,088 (52.0) | 34,284 (53.0) | 6,714,150 (51.8) |
| Male                                       | 45,555 (55.1)                                  | 396,446 (51.4) | 813,072 (49.8) | 1,559,587 (48.3) | 2,186,947 (47.0) | 1,204,876 (48.0) | 30,430 (47.0) | 6,236,913 (48.2) |
| <b>Neighbourhood-level income quintile</b> |                                                |                |                |                  |                  |                  |               |                  |
| 1 (lowest)                                 | 21,468 (26.0)                                  | 188,496 (24.4) | 340,108 (20.8) | 580,649 (18.0)   | 782,862 (16.8)   | 473,926 (18.9)   | 18,230 (28.2) | 2,405,739 (18.6) |
| 2                                          | 17,266 (20.9)                                  | 164,458 (21.3) | 332,357 (20.3) | 617,686 (19.1)   | 870,823 (18.7)   | 494,764 (19.7)   | 13,576 (21.0) | 2,510,930 (19.4) |
| 3                                          | 15,646 (18.9)                                  | 155,461 (20.1) | 341,044 (20.9) | 666,171 (20.6)   | 942,534 (20.2)   | 510,991 (20.3)   | 12,547 (19.4) | 2,644,394 (20.4) |
| 4                                          | 14,969 (18.1)                                  | 141,287 (18.3) | 324,103 (19.8) | 685,002 (21.2)   | 993,671 (21.3)   | 515,099 (20.5)   | 10,214 (15.8) | 2,684,345 (20.7) |
| 5 (highest)                                | 12,634 (15.3)                                  | 119,845 (15.5) | 291,727 (17.9) | 671,129 (20.8)   | 1,055,796 (22.7) | 510,846 (20.3)   | 9,958 (15.4)  | 2,671,935 (20.6) |
| Missing                                    | 706 (0.9)                                      | 2,261 (0.3)    | 3,985 (0.2)    | 8,586 (0.3)      | 11,655 (0.3)     | 6,338 (0.3)      | 189 (0.3)     | 33,720 (0.3)     |
| <b>Material Deprivation quintile</b>       |                                                |                |                |                  |                  |                  |               |                  |
| 1 (least deprived)                         | 15,355 (18.6)                                  | 126,998 (16.5) | 306,477 (18.8) | 738,019 (22.9)   | 1,234,895 (26.5) | 609,098 (24.2)   | 13,683 (21.1) | 3,044,525 (23.5) |
| 2                                          | 14,157 (17.1)                                  | 142,477 (18.5) | 330,767 (20.3) | 698,625 (21.6)   | 1,028,992 (22.1) | 538,541 (21.4)   | 10,845 (16.8) | 2,764,404 (21.3) |
| 3                                          | 14,556 (17.6)                                  | 143,940 (18.6) | 328,007 (20.1) | 620,901 (19.2)   | 871,073 (18.7)   | 475,116 (18.9)   | 11,627 (18.0) | 2,465,220 (19.0) |
| 4                                          | 15,894 (19.2)                                  | 157,907 (20.5) | 324,888 (19.9) | 583,408 (18.1)   | 765,832 (16.4)   | 443,258 (17.6)   | 12,155 (18.8) | 2,303,342 (17.8) |
| 5 (most deprived)                          | 19,541 (23.6)                                  | 186,363 (24.1) | 327,345 (20.0) | 559,404 (17.3)   | 728,276 (15.6)   | 433,939 (17.3)   | 15,934 (24.6) | 2,270,802 (17.5) |
| Missing                                    | 3,186 (3.9)                                    | 14,123 (1.8)   | 15,840 (1.0)   | 28,866 (0.9)     | 28,273 (0.6)     | 12,012 (0.5)     | 470 (0.7)     | 102,770 (0.8)    |
| <b>Ethnic Diversity quintile</b>           |                                                |                |                |                  |                  |                  |               |                  |
| 1 (least diverse)                          | 12,908 (15.6)                                  | 142,811 (18.5) | 350,356 (21.5) | 641,513 (19.9)   | 618,362 (13.3)   | 202,198 (8.0)    | 6,382 (9.9)   | 1,974,530 (15.2) |
| 2                                          | 12,470 (15.1)                                  | 136,906 (17.7) | 322,545 (19.7) | 642,478 (19.9)   | 726,978 (15.6)   | 274,019 (10.9)   | 5,966 (9.2)   | 2,121,362 (16.4) |
| 3                                          | 13,694 (16.6)                                  | 127,214 (16.5) | 271,540 (16.6) | 602,331 (18.7)   | 864,782 (18.6)   | 408,716 (16.3)   | 9,656 (14.9)  | 2,297,933 (17.7) |
| 4                                          | 16,790 (20.3)                                  | 144,724 (18.8) | 276,943 (17.0) | 610,992 (18.9)   | 1,060,728 (22.8) | 599,754 (23.9)   | 15,649 (24.2) | 2,725,580 (21.0) |
| 5 (most diverse)                           | 23,641 (28.6)                                  | 206,030 (26.7) | 396,100 (24.3) | 703,043 (21.8)   | 1,358,218 (29.2) | 1,015,265 (40.4) | 26,591 (41.1) | 3,728,888 (28.8) |

|                                                 |               |                |                  |                  |                  |                  |               |                   |
|-------------------------------------------------|---------------|----------------|------------------|------------------|------------------|------------------|---------------|-------------------|
| Missing                                         | 3,186 (3.9)   | 14,123 (1.8)   | 15,840 (1.0)     | 28,866 (0.9)     | 28,273 (0.6)     | 12,012 (0.5)     | 470 (0.7)     | 102,770 (0.8)     |
| <b>Recent Registrant (&lt;10 years)</b>         |               |                |                  |                  |                  |                  |               |                   |
| Yes                                             | 7,765 (9.4)   | 72,718 (9.4)   | 144,967 (8.9)    | 233,795 (7.2)    | 403,698 (8.7)    | 267,726 (10.7)   | 8,443 (13.0)  | 1,139,112 (8.8)   |
| No                                              | 68,636 (83.0) | 624,350 (80.9) | 1,318,635 (80.7) | 2,652,901 (82.2) | 3,790,998 (81.4) | 2,030,442 (80.8) | 50,453 (78.0) | 10,536,415 (81.4) |
| Missing                                         | 6,288 (7.6)   | 74,740 (9.7)   | 169,722 (10.4)   | 342,527 (10.6)   | 462,645 (9.9)    | 213,796 (8.5)    | 5,818 (9.0)   | 1,275,536 (9.8)   |
| <b>Morbidity (Resource Utilization Band)</b>    |               |                |                  |                  |                  |                  |               |                   |
| 0 (non-user)                                    | 4,328 (5.2)   | 59,639 (7.7)   | 130,063 (8.0)    | 271,999 (8.4)    | 379,715 (8.2)    | 201,771 (8.0)    | 3,914 (6.0)   | 1,051,429 (8.1)   |
| 1                                               | 5,217 (6.3)   | 51,449 (6.7)   | 107,877 (6.6)    | 204,767 (6.3)    | 279,644 (6.0)    | 144,922 (5.8)    | 3,927 (6.1)   | 797,803 (6.2)     |
| 2                                               | 17,557 (21.2) | 166,766 (21.6) | 354,856 (21.7)   | 687,322 (21.3)   | 969,771 (20.8)   | 507,882 (20.2)   | 13,855 (21.4) | 2,718,009 (21.0)  |
| 3                                               | 38,020 (46.0) | 358,321 (46.4) | 752,307 (46.1)   | 1,484,831 (46.0) | 2,192,581 (47.1) | 1,209,498 (48.1) | 31,395 (48.5) | 6,066,953 (46.8)  |
| 4                                               | 11,435 (13.8) | 95,981 (12.4)  | 205,958 (12.6)   | 415,068 (12.9)   | 608,355 (13.1)   | 329,302 (13.1)   | 8,585 (13.3)  | 1,674,684 (12.9)  |
| 5 (highest user)                                | 6,132 (7.4)   | 39,652 (5.1)   | 82,263 (5.0)     | 165,236 (5.1)    | 227,275 (4.9)    | 118,589 (4.7)    | 3,038 (4.7)   | 642,185 (5.0)     |
| <b>Co-Morbidity (Adjusted Diagnoses Groups)</b> |               |                |                  |                  |                  |                  |               |                   |
| 0                                               | 4,347 (5.3)   | 59,866 (7.8)   | 130,708 (8.0)    | 273,501 (8.5)    | 381,607 (8.2)    | 202,442 (8.1)    | 3,924 (6.1)   | 1,056,395 (8.2)   |
| 1-4                                             | 44,431 (53.7) | 396,784 (51.4) | 839,609 (51.4)   | 1,627,346 (50.4) | 2,284,776 (49.1) | 1,202,766 (47.9) | 32,437 (50.1) | 6,428,149 (49.6)  |
| 5-9                                             | 26,680 (32.3) | 255,438 (33.1) | 539,600 (33.0)   | 1,081,818 (33.5) | 1,615,004 (34.7) | 890,759 (35.5)   | 22,758 (35.2) | 4,432,057 (34.2)  |
| ≥ 10                                            | 7,231 (8.7)   | 59,720 (7.7)   | 123,407 (7.6)    | 246,558 (7.6)    | 375,954 (8.1)    | 215,997 (8.6)    | 5,595 (8.6)   | 1,034,462 (8.0)   |
| <b>Chronic Conditions</b>                       |               |                |                  |                  |                  |                  |               |                   |
| Hypertension                                    | 20,185 (24.4) | 187,063 (24.2) | 385,037 (23.6)   | 737,439 (22.8)   | 1,025,070 (22.0) | 550,637 (21.9)   | 13,168 (20.3) | 2,918,599 (22.5)  |
| DM                                              | 10,862 (13.1) | 95,571 (12.4)  | 192,845 (11.8)   | 359,838 (11.1)   | 503,761 (10.8)   | 286,148 (11.4)   | 6,986 (10.8)  | 1,456,011 (11.2)  |
| CHF                                             | 2,983 (3.6)   | 16,652 (2.2)   | 35,249 (2.2)     | 66,556 (2.1)     | 84,626 (1.8)     | 41,660 (1.7)     | 983 (1.5)     | 248,709 (1.9)     |
| AMI                                             | 1,120 (1.4)   | 9,454 (1.2)    | 20,156 (1.2)     | 38,179 (1.2)     | 47,613 (1.0)     | 23,262 (0.9)     | 493 (0.8)     | 140,277 (1.1)     |
| Asthma                                          | 12,831 (15.5) | 118,029 (15.3) | 248,568 (15.2)   | 490,870 (15.2)   | 726,260 (15.6)   | 395,342 (15.7)   | 10,339 (16.0) | 2,002,239 (15.5)  |
| COPD                                            | 6,148 (7.4)   | 57,388 (7.4)   | 124,824 (7.6)    | 232,495 (7.2)    | 284,035 (6.1)    | 139,636 (5.6)    | 3,539 (5.5)   | 848,065 (6.5)     |
| Mental health                                   | 22,285 (27.0) | 157,060 (20.3) | 335,569 (20.5)   | 663,481 (20.5)   | 994,442 (21.4)   | 549,442 (21.9)   | 16,756 (25.9) | 2,739,035 (21.1)  |
| <b>Rurality</b>                                 |               |                |                  |                  |                  |                  |               |                   |
| Big cities                                      | 36,934 (44.7) | 298,760 (38.7) | 545,498 (33.4)   | 1,122,929 (34.8) | 2,033,696 (43.7) | 1,259,491 (50.1) | 37,770 (58.4) | 5,335,078 (41.2)  |
| Small cities                                    | 21,951 (26.5) | 221,397 (28.7) | 444,488 (27.2)   | 955,035 (29.6)   | 1,534,725 (33.0) | 867,594 (34.5)   | 16,362 (25.3) | 4,061,552 (31.4)  |
| Small towns                                     | 13,144 (15.9) | 171,619 (22.2) | 428,365 (26.2)   | 809,967 (25.1)   | 802,412 (17.2)   | 298,358 (11.9)   | 4,845 (7.5)   | 2,528,710 (19.5)  |
| Rural                                           | 10,660 (12.9) | 80,032 (10.4)  | 214,973 (13.2)   | 341,292 (10.6)   | 286,508 (6.2)    | 86,521 (3.4)     | 5,737 (8.9)   | 1,025,723 (7.9)   |

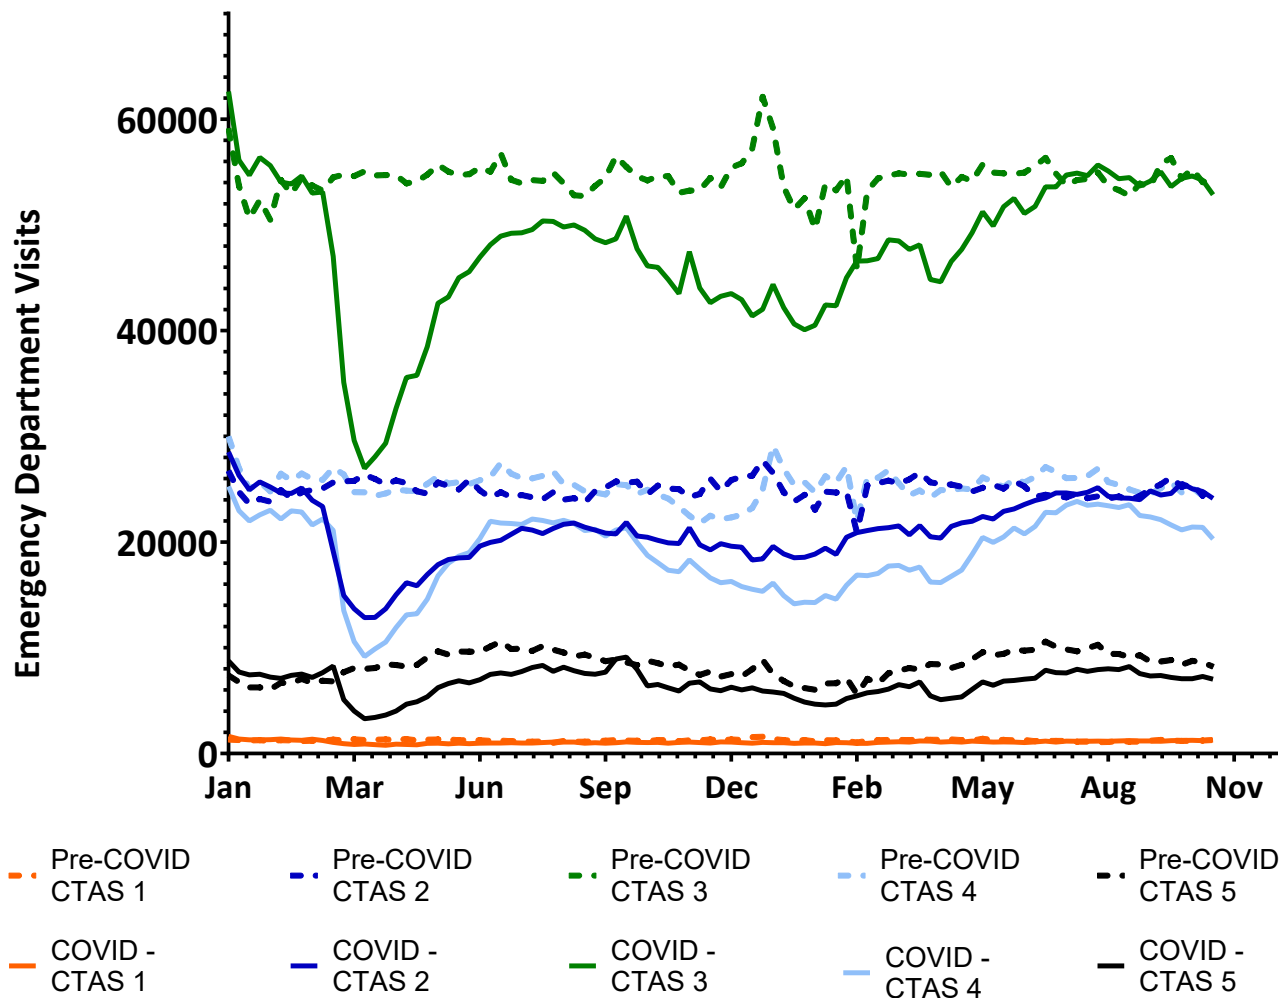

**eAppendix 6.** Weekly Emergency Department Visits by Canadian Triage and Acuity Scale (CTAS) Level, January 2019 to October 2021.



**eAppendix 7.** Number of ED visits per 1000 patients by rostered physician's ratio of virtual visit

| VARIABLE                         | VALUE     | 0               | >0-0.2          | >0.2-0.4        | >0.4-0.6       | >0.6-0.8       | >0.8-<1        | 1               | TOTAL          |
|----------------------------------|-----------|-----------------|-----------------|-----------------|----------------|----------------|----------------|-----------------|----------------|
| <b>Feb 1 to Apr 30, 2021</b>     |           |                 |                 |                 |                |                |                |                 |                |
| Number of physicians             |           | 956             | 900             | 1217            | 2058           | 3848           | 3921           | 602             | 13502          |
| Number of patients               |           | N=111,463       | N=557,348       | N=1,123,463     | N=2,234,969    | N=4,402,614    | N=4,253,334    | N=164,977       | N=12,848,168   |
| Number of ED visits per 1000 pts | Mean ± SD | 150.72 ± 827.77 | 91.49 ± 457.37  | 86.30 ± 419.58  | 83.45 ± 416.98 | 79.12 ± 402.39 | 70.49 ± 362.80 | 81.76 ± 425.21  | 78.83 ± 402.64 |
| <b>May 1 to July 31, 2021</b>    |           |                 |                 |                 |                |                |                |                 |                |
| Number of physicians             |           | 976             | 1140            | 1555            | 2592           | 3813           | 2779           | 527             | 13382          |
| Number of patients               |           | N=128,402       | N=766,321       | N=1,539,644     | N=2,865,554    | N=4,425,467    | N=2,908,046    | N=139,580       | N=12,773,014   |
| Number of ED visits per 1000 pts | Mean ± SD | 151.43 ± 754.16 | 107.66 ± 511.62 | 102.54 ± 476.90 | 99.31 ± 443.25 | 89.99 ± 410.01 | 85.12 ± 396.26 | 95.18 ± 413.77  | 94.22 ± 434.58 |
| <b>Aug 1 to Oct 31, 2021</b>     |           |                 |                 |                 |                |                |                |                 |                |
| Number of physicians             |           | 1080            | 1730            | 2433            | 3138           | 2930           | 1410           | 426             | 13147          |
| Number of patients               |           | N=169,517       | N=1,412,917     | N=2,633,551     | N=3,582,994    | N=3,380,681    | N=1,354,990    | N=99,343        | N=12,633,993   |
| Number of ED visits per 1000 pts | Mean ± SD | 147.85 ± 686.71 | 113.46 ± 518.62 | 106.79 ± 465.75 | 97.44 ± 430.29 | 89.90 ± 399.99 | 91.46 ± 409.19 | 104.30 ± 441.07 | 99.25 ± 443.31 |

**eAppendix 8.** Patient Health Service Utilization Stratified by the Attached Physician’s Percent of Care Provided Virtually, between February 1 and October 2021, in Ontario Canada, by Rurality.

| Physician % Virtual Care                                               |                                                                        | 0%                  | >0-20%               | >20-40%              | >40-60%              | >60-80%              | >80-<100%            | 100%                | Total                |
|------------------------------------------------------------------------|------------------------------------------------------------------------|---------------------|----------------------|----------------------|----------------------|----------------------|----------------------|---------------------|----------------------|
| RIO 0                                                                  | <b>No. Patients</b>                                                    | N=36,934            | N=298,760            | N=545,498            | N=1,122,929          | N=2,033,696          | N=1,259,491          | N=37,770            | N=5,335,078          |
|                                                                        | <b>Primary Care Services</b>                                           |                     |                      |                      |                      |                      |                      |                     |                      |
|                                                                        | Any primary care visit, n (%)                                          | 21,703<br>(58.8)    | 193,025<br>(64.6)    | 356,675<br>(65.4)    | 728,409<br>(64.9)    | 1,332,732<br>(65.5)  | 828,922<br>(65.8)    | 24,402<br>(64.6)    | 3,485,868<br>(65.3)  |
|                                                                        | Number of primary care visits per patient, mean ± SD                   | 2.7 ± 5.1           | 2.8 ± 4.6            | 2.8 ± 4.3            | 2.6 ± 4.0            | 2.7 ± 4.0            | 2.9 ± 4.3            | 3.2 ± 5.3           | 2.7 ± 4.1            |
|                                                                        | Percent of visits with usual family physician <sup>a</sup> , mean ± SD | 52.6 ± 44.6         | 64.3 ± 41.0          | 68.1 ± 39.3          | 70.6 ± 37.5          | 70.7 ± 37.3          | 68.0 ± 39.0          | 45.5 ± 43.0         | 69.1 ± 38.4          |
|                                                                        | <b>Other Health Care Use</b>                                           |                     |                      |                      |                      |                      |                      |                     |                      |
|                                                                        | Any specialist visits, n (%)                                           | 14,756<br>(40.0)    | 115,206<br>(38.6)    | 211,626<br>(38.8)    | 446,582<br>(39.8)    | 833,316<br>(41.0)    | 519,624<br>(41.3)    | 15,286<br>(40.5)    | 2,156,396<br>(40.4)  |
|                                                                        | Ambulatory care-sensitive condition visits, n (%)                      | 139 (0.4)           | 766 (0.3)            | 1,250 (0.2)          | 2,606 (0.2)          | 4,027 (0.2)          | 2,430 (0.2)          | 67 (0.2)            | 11,285 (0.2)         |
|                                                                        | <b>Emergency Department Utilization, February to October 2019/2021</b> |                     |                      |                      |                      |                      |                      |                     |                      |
|                                                                        | Total visits per 1,000, 2021, mean ± SD <sup>b</sup>                   | 393.3 ± 1914.7      | 252.3 ± 933.9        | 242.0 ± 1120.6       | 240.6 ± 853.4        | 223.0 ± 776.2        | 221.7 ± 760.2        | 245.2 ± 795.7       | 231.4 ± 852.9        |
|                                                                        | Total visits per 1,000, 2019, mean ± SD <sup>b</sup>                   | 414.3 ± 2018.2      | 293.4 ± 937.8        | 279.9 ± 906.7        | 275.8 ± 883.0        | 256.5 ± 855.4        | 251.0 ± 798.4        | 257.3 ± 782.6       | 265.5 ± 879.7        |
|                                                                        | Absolute difference 2021 vs 2019 (95% CI)                              | -21.1 (-47.0, 4.9)  | -41.0 (-45.8, -36.3) | -37.9 (-41.8, -33.9) | -35.2 (-37.6, -32.9) | -33.5 (-35.1, -31.9) | -29.3 (-31.2, -27.3) | -12.1 (-22.8, -1.3) | -34.1 (-35.2, -33.1) |
|                                                                        | Percent change 2021 vs 2019 (95% CI)                                   | -5.1 (-11.1, 1.1)   | -14.0 (-15.5, -12.5) | -13.5 (-14.9, -12.2) | -12.8 (-13.6, -12.0) | -13.1 (-13.7, -12.5) | -11.7 (-12.4, -10.9) | -4.7 (-8.8, 0.6)    | -12.9 (-13.2, -12.5) |
|                                                                        | RIO 1-9                                                                | <b>No. Patients</b> | N=21,951             | N=221,397            | N=444,488            | N=955,035            | N=1,534,725          | N=867,594           | N=16,362             |
| <b>Primary Care Services</b>                                           |                                                                        |                     |                      |                      |                      |                      |                      |                     |                      |
| Any primary care visit, n (%)                                          |                                                                        | 12,886<br>(58.7)    | 145,329<br>(65.6)    | 290,727<br>(65.4)    | 622,460<br>(65.2)    | 1,023,111<br>(66.7)  | 588,907<br>(67.9)    | 10,546<br>(64.5)    | 2,693,966<br>(66.3)  |
| Number of primary care visits per patient, mean ± SD                   |                                                                        | 2.5 ± 4.4           | 2.7 ± 4.2            | 2.7 ± 4.1            | 2.6 ± 3.9            | 2.8 ± 4.1            | 3.1 ± 4.5            | 3.4 ± 6.0           | 2.8 ± 4.1            |
| Percent of visits with usual family physician <sup>a</sup> , mean ± SD |                                                                        | 45.7 ± 44.6         | 64.5 ± 40.7          | 66.2 ± 39.3          | 69.2 ± 37.6          | 70.9 ± 37.0          | 67.5 ± 38.8          | 32.4 ± 41.1         | 68.6 ± 38.2          |
| <b>Other Health Care Use</b>                                           |                                                                        |                     |                      |                      |                      |                      |                      |                     |                      |
| Any specialist visits, n (%)                                           |                                                                        | 8,120<br>(37.0)     | 83,129<br>(37.5)     | 169,962<br>(38.2)    | 371,052<br>(38.9)    | 601,803<br>(39.2)    | 341,899<br>(39.4)    | 6,405 (39.1)        | 1,582,370<br>(39.0)  |

|  |                                                                        |                   |                      |                      |                      |                      |                      |                   |                      |
|--|------------------------------------------------------------------------|-------------------|----------------------|----------------------|----------------------|----------------------|----------------------|-------------------|----------------------|
|  | Ambulatory care-sensitive condition visits, n (%)                      | 70 (0.3)          | 517 (0.2)            | 953 (0.2)            | 1,963 (0.2)          | 2,723 (0.2)          | 1,274 (0.1)          | 23 (0.1)          | 7,523 (0.2)          |
|  | <b>Emergency Department Utilization, February to October 2019/2021</b> |                   |                      |                      |                      |                      |                      |                   |                      |
|  | Total visits per 1,000, 2021, mean ± SD <sup>b</sup>                   | 356.5 ± 1450.7    | 257.3 ± 1061.1       | 242.9 ± 808.5        | 239.3 ± 811.4        | 225.2 ± 754.6        | 219.8 ± 731.0        | 285.2 ± 1438.8    | 232.0 ± 797.6        |
|  | Total visits per 1,000, 2019, mean ± SD <sup>b</sup>                   | 350.3 ± 1827.1    | 282.8 ± 944.2        | 269.6 ± 808.5        | 268.4 ± 822.5        | 250.8 ± 785.1        | 247.8 ± 800.2        | 281.5 ± 911.3     | 259.1 ± 825.2        |
|  | Absolute difference 2021 vs 2019                                       | 6.3 (-22.5, 35.0) | -25.5 (-31.5, -19.4) | -26.7 (-30.2, -23.2) | -29.1 (-31.4, -26.7) | -25.6 (-27.3, -23.8) | -28.0 (-30.3, -25.6) | 3.7 (-18.1, 25.5) | -27.2 (-28.3, -26.0) |
|  | Percent change 2021 vs 2019                                            | 1.8 (-6.0, 9.8)   | -9.0 (-11.1, -6.9)   | -9.9 (-11.1, -8.7)   | -10.8 (-11.7, -10.0) | -10.2 (-10.9, -9.5)  | -11.3 (-12.2, -10.4) | 1.3 (-7.5, 10.2)  | -10.5 (-10.9, -10.1) |
|  | <b>No. Patients</b>                                                    | N=13,144          | N=171,619            | N=428,365            | N=809,967            | N=802,412            | N=298,358            | N=4,845           | N=2,528,710          |
|  | <b>Primary Care Services</b>                                           |                   |                      |                      |                      |                      |                      |                   |                      |
|  | Any primary care visit, n (%)                                          | 6,697 (51.0)      | 96,813 (56.4)        | 250,322 (58.4)       | 478,119 (59.0)       | 486,813 (60.7)       | 184,204 (61.7)       | 2,937 (60.6)      | 1,505,905 (59.6)     |
|  | Number of primary care visits per patient, mean ± SD                   | 2.6 ± 5.6         | 1.9 ± 3.8            | 1.9 ± 3.3            | 1.9 ± 3.1            | 2.1 ± 3.3            | 2.4 ± 4.1            | 2.5 ± 4.7         | 2.0 ± 3.4            |
|  | Percent of visits with usual family physician <sup>a</sup> , mean ± SD | 42.0 ± 45.3       | 70.9 ± 38.3          | 75.9 ± 34.9          | 75.7 ± 34.4          | 74.4 ± 35.1          | 68.1 ± 38.7          | 25.5 ± 36.3       | 73.7 ± 35.8          |
|  | <b>Other Health Care Use</b>                                           |                   |                      |                      |                      |                      |                      |                   |                      |
|  | Any specialist visits, n (%)                                           | 4,973 (37.8)      | 65,808 (38.3)        | 165,307 (38.6)       | 312,887 (38.6)       | 316,486 (39.4)       | 119,127 (39.9)       | 1,850 (38.2)      | 986,438 (39.0)       |
|  | Ambulatory care-sensitive condition visits, n (%)                      | 53 (0.4)          | 558 (0.3)            | 1,262 (0.3)          | 2,201 (0.3)          | 2,043 (0.3)          | 730 (0.2)            | 10 (0.2)          | 6,857 (0.3)          |
|  | <b>Emergency Department Utilization, February to October 2019/2021</b> |                   |                      |                      |                      |                      |                      |                   |                      |
|  | Total visits per 1,000, 2021, mean ± SD <sup>b</sup>                   | 564.2 ± 1780.3    | 371.3 ± 1104.3       | 334.3 ± 924.4        | 321.7 ± 924.7        | 313.2 ± 884.5        | 326.9 ± 931.4        | 389.6 ± 970.2     | 326.6 ± 933.5        |
|  | Total visits per 1,000, 2019, mean ± SD <sup>b</sup>                   | 510.7 ± 1472.8    | 433.2 ± 1147.6       | 398.7 ± 1018.9       | 375.9 ± 974.9        | 360.9 ± 940.5        | 353.8 ± 944.1        | 389.1 ± 1125.1    | 378.6 ± 991.7        |
|  | Absolute difference 2021 vs 2019 (95% CI)                              | 53.5 (21.6, 85.5) | -61.9 (-69.5, -54.3) | -64.5 (-68.7, -60.2) | -54.1 (-57.2, -51.1) | -47.8 (-50.7, -44.8) | -26.8 (-31.7, -21.9) | 0.5 (-41.3, 42.3) | -52.0 (-53.8, -50.3) |
|  | Percent change 2021 vs 2019                                            | 10.5 (3.6, 17.5)  | -14.3 (-15.9, -12.7) | -16.2 (-17.1, -15.2) | -14.4 (-15.2, -13.7) | -13.2 (-14.0, -12.5) | -7.6 (-8.9, -6.3)    | 0.13 (-9.9, 10.6) | -13.7 (-14.2, -13.3) |
|  | <b>No. Patients</b>                                                    | N=10,660          | N=80,032             | N=214,973            | N=341,292            | N=286,508            | N=86,521             | N=5,737           | N=1,025,723          |
|  | <b>Primary Care Services</b>                                           |                   |                      |                      |                      |                      |                      |                   |                      |
|  | Any primary care visit, n (%)                                          | 4,999 (46.9)      | 41,588 (52.0)        | 113,613 (52.8)       | 186,306 (54.6)       | 156,180 (54.5)       | 50,155 (58.0)        | 3,013 (52.5)      | 555,854 (54.2)       |

|                                                                        |                           |                                 |                             |                             |                          |                          |                       |                           |
|------------------------------------------------------------------------|---------------------------|---------------------------------|-----------------------------|-----------------------------|--------------------------|--------------------------|-----------------------|---------------------------|
| Number of primary care visits per patient, mean ± SD                   | 1.9 ± 4.4                 | 1.7 ± 3.2                       | 1.6 ± 2.9                   | 1.7 ± 2.8                   | 1.8 ± 3.0                | 2.3 ± 4.1                | 1.9 ± 4.1             | 1.7 ± 3.1                 |
| Percent of visits with usual family physician <sup>a</sup> , mean ± SD | 40.6 ± 42.8               | 70.7 ± 38.6                     | 74.9 ± 35.5                 | 75.1 ± 34.7                 | 74.9 ± 35.0              | 70.5 ± 38.8              | 25.4 ± 38.5           | 73.7 ± 36.08              |
| <b>Other Health Care Use</b>                                           |                           |                                 |                             |                             |                          |                          |                       |                           |
| Any specialist visits, n (%)                                           | 3,632<br>(34.1)           | 26,165<br>(32.7)                | 74,416 (34.6)               | 121,089<br>(35.5)           | 104,309<br>(36.4)        | 31,792 (36.7)            | 2,204 (38.4)          | 363,607 (35.4)            |
| Ambulatory care-sensitive condition visits, n (%)                      | 62 (0.6)                  | 244 (0.3)                       | 639 (0.3)                   | 991 (0.3)                   | 815 (0.3)                | 265 (0.3)                | 14 (0.2)              | 3,030 (0.3)               |
| <b>Emergency Department Utilization, February to October 2019/2021</b> |                           |                                 |                             |                             |                          |                          |                       |                           |
| Total visits per 1,000, 2021, mean ± SD <sup>b</sup>                   | 872.8 ±<br>2751.1         | 539.5 ±<br>1532.7               | 459.9 ±<br>1369.8           | 461.6 ±<br>1304.3           | 456.6 ±<br>1227.1        | 465.8 ±<br>1319.2        | 567.1 ±<br>1264.2     | 471.0 ± 1341.4            |
| Total visits per 1,000, 2019, mean ± SD <sup>b</sup>                   | 737.3 ±<br>1896.7         | 667.7 ±<br>1716.2               | 570.5 ±<br>1401.4           | 569.8 ±<br>1556.9           | 548.9 ±<br>1772.0        | 530.2 ±<br>1312.4        | 570.1 ±<br>1224.3     | 572.6 ± 1589.5            |
| Absolute difference 2021 vs 2019                                       | 135.5<br>(83.2,<br>187.8) | -128.2 (-<br>144.3, -<br>112.0) | -110.6 (-<br>119.1, -102.0) | -108.2 (-<br>115.2, -101.1) | -92.4 (-100.5,<br>-84.2) | -64.5 (-76.9, -<br>52.1) | -3.0 (-53.7,<br>47.8) | -101.6 (-105.8,<br>-97.5) |
| Percent change 2021 vs 2019                                            | 18.4 (10.1,<br>26.8)      | -19.2 (-21.4,<br>-17.0)         | -19.4 (-20.7, -<br>18.0)    | -19.0 (-20.1, -<br>17.9)    | -16.8 (-18.1, -<br>15.5) | -12.2 (-14.4, -<br>9.9)  | -0.5 (-9.3,<br>8.6)   | -17.8 (-18.4, -<br>17.1)  |

<sup>a</sup> Among patients with 2 or more visits between February and October 2021

<sup>b</sup> This includes only patients whose attached physicians had claims in both 2021 and 2019.

Abbreviations: SD, standard deviation; CI, confidence interval

**eAppendix 9.** Physician and Practice Characteristics by the Percent of Care Provided Virtually, Comprehensive Family Physicians, between February 1 and October 31, 2021, in Ontario, Canada.

| <b>Physician % Virtual Care</b>     | <b>0%</b> | <b>&gt;0-20%</b> | <b>&gt;20-40%</b> | <b>&gt;40-60%</b> | <b>&gt;60-80%</b> | <b>&gt;80-&lt;100%</b> | <b>100%</b> | <b>Total</b> |
|-------------------------------------|-----------|------------------|-------------------|-------------------|-------------------|------------------------|-------------|--------------|
| <b>No. Physicians</b>               | N=117     | N=544            | N=1,118           | N=2,265           | N=3,432           | N=1,881                | N=105       | N=9,462      |
| <b>No. Patients</b>                 | N=46,747  | N=661,761        | N=1,476,716       | N=2,966,294       | N=4,422,486       | N=2,386,349            | N=51,668    | N=12,125,959 |
| <b>Physician Age</b>                |           |                  |                   |                   |                   |                        |             |              |
| ≤44                                 | 33 (28.2) | 114 (21.0)       | 378 (33.8)        | 875 (38.6)        | 1,319 (38.4)      | 599 (31.8)             | 43 (41.0)   | 3,361 (35.5) |
| 45-64                               | 34 (29.1) | 258 (47.4)       | 512 (45.8)        | 1,076 (47.5)      | 1,674 (48.8)      | 862 (45.8)             | 30 (28.6)   | 4,446 (47.0) |
| 65-74                               | 37 (31.6) | 124 (22.8)       | 179 (16.0)        | 256 (11.3)        | 369 (10.8)        | 335 (17.8)             | 23 (21.9)   | 1,323 (14.0) |
| ≥75                                 | 13 (11.1) | 48 (8.8)         | 49 (4.4)          | 58 (2.6)          | 70 (2.0)          | 85 (4.5)               | 9 (8.6)     | 332 (3.5)    |
| <b>Physician Sex</b>                |           |                  |                   |                   |                   |                        |             |              |
| Female                              | 31 (26.5) | 150 (27.6)       | 438 (39.2)        | 1,152 (50.9)      | 1,953 (56.9)      | 967 (51.4)             | 68 (64.8)   | 4,759 (50.3) |
| Male                                | 86 (73.5) | 394 (72.4)       | 680 (60.8)        | 1,113 (49.1)      | 1,479 (43.1)      | 914 (48.6)             | 37 (35.2)   | 4,703 (49.7) |
| <b>Primary Care Enrolment Model</b> |           |                  |                   |                   |                   |                        |             |              |
| Non-team capitation                 | 8 (6.8)   | 126 (23.2)       | 317 (28.4)        | 727 (32.1)        | 1,190 (34.7)      | 532 (28.3)             | 11 (10.5)   | 2,911 (30.8) |
| Enhanced fee-for-service            | 19 (16.2) | 155 (28.5)       | 297 (26.6)        | 457 (20.2)        | 876 (25.5)        | 725 (38.5)             | 23 (21.9)   | 2,552 (27.0) |
| Team-based capitation               | 12 (10.3) | 60 (11.0)        | 286 (25.6)        | 814 (35.9)        | 1,044 (30.4)      | 321 (17.1)             | 9 (8.6)     | 2,546 (26.9) |
| Traditional fee-for-service         | 78 (66.7) | 203 (37.3)       | 218 (19.5)        | 267 (11.8)        | 321 (9.4)         | 303 (16.1)             | 62 (59.0)   | 1,452 (15.3) |
| Missing                             | 0 (0.0)   | 0 (0.0)          | 0 (0.0)           | 0 (0.0)           | 1 (0.0)           | 0 (0.0)                | 0 (0.0)     | 1 (0.0)      |
| <b>Rurality of Practice (RIO)</b>   |           |                  |                   |                   |                   |                        |             |              |
| Big cities                          | 54 (46.2) | 240 (44.1)       | 430 (38.5)        | 925 (40.8)        | 1,797 (52.4)      | 1,113 (59.2)           | 66 (62.9)   | 4,625 (48.9) |
| Small cities                        | 19 (16.2) | 146 (26.8)       | 296 (26.5)        | 643 (28.4)        | 1,018 (29.7)      | 558 (29.7)             | 25 (23.8)   | 2,705 (28.6) |
| Small towns                         | 25 (21.4) | 111 (20.4)       | 250 (22.4)        | 459 (20.3)        | 403 (11.7)        | 143 (7.6)              | 7 (6.7)     | 1,398 (14.8) |
| Rural                               | 19 (16.2) | 47 (8.6)         | 142 (12.7)        | 238 (10.5)        | 214 (6.2)         | 67 (3.6)               | 7 (6.7)     | 734 (7.8)    |
| <b>Patient Panel Size</b>           |           |                  |                   |                   |                   |                        |             |              |
| <100                                | 57 (48.7) | 61 (11.2)        | 81 (7.2)          | 122 (5.4)         | 116 (3.4)         | 89 (4.7)               | 35 (33.3)   | 561 (5.9)    |
| 100-499                             | 30 (25.6) | 103 (18.9)       | 106 (9.5)         | 169 (7.5)         | 239 (7.0)         | 200 (10.6)             | 32 (30.5)   | 879 (9.3)    |
| 500-999                             | 9 (7.7)   | 85 (15.6)        | 201 (18.0)        | 490 (21.6)        | 802 (23.4)        | 443 (23.6)             | 20 (19.0)   | 2,050 (21.7) |
| 1000-1499                           | 15 (12.8) | 104 (19.1)       | 321 (28.7)        | 654 (28.9)        | 1,152 (33.6)      | 520 (27.6)             | 9 (8.6)     | 2,775 (29.3) |
| 1500-1999                           | -         | 79 (14.5)        | 212 (19.0)        | 469 (20.7)        | 675 (19.7)        | 341 (18.1)             | -           | 1,785 (18.9) |
| ≥2000                               | -         | 112 (20.6)       | 197 (17.6)        | 361 (15.9)        | 447 (13.0)        | 288 (15.3)             | -           | 1,411 (14.9) |
| Missing                             | 0 (0.0)   | 0 (0.0)          | 0 (0.0)           | 0 (0.0)           | 1 (0.0)           | 0 (0.0)                | 0 (0.0)     | 1 (0.0)      |

**eAppendix 10.** Characteristics of Patients Attached to Comprehensive Family Physicians by the Percent of Physician Primary Care Provided Virtually, between February 1 and October 31, 2021, in Ontario, Canada.

| Characteristic, n (%)                      | Percent Virtual Care of Primary Care Physician |                |                |                  |                  |                  |               | Total            |
|--------------------------------------------|------------------------------------------------|----------------|----------------|------------------|------------------|------------------|---------------|------------------|
|                                            | 0%                                             | >0-20%         | >20-40%        | >40-60%          | >60-80%          | >80-<100         | 100%          |                  |
| <b>No.</b>                                 | N=46,747                                       | N=661,761      | N=1,476,716    | N=2,966,294      | N=4,422,486      | N=2,386,349      | N=51,668      | N=12,012,021     |
| <b>Age</b>                                 |                                                |                |                |                  |                  |                  |               |                  |
| ≤18                                        | 5,900 (12.6)                                   | 115,509 (17.5) | 277,180 (18.8) | 567,973 (19.1)   | 812,766 (18.4)   | 394,966 (16.6)   | 8,678 (16.8)  | 2,182,972 (18.2) |
| 19-29                                      | 6,510 (13.9)                                   | 92,402 (14.0)  | 200,461 (13.6) | 388,821 (13.1)   | 595,219 (13.5)   | 340,662 (14.3)   | 8,594 (16.6)  | 1,632,669 (13.6) |
| 30-44                                      | 8,980 (19.2)                                   | 131,614 (19.9) | 289,588 (19.6) | 585,789 (19.7)   | 919,525 (20.8)   | 520,693 (21.8)   | 12,330 (23.9) | 2,468,519 (20.6) |
| 45-64                                      | 13,929 (29.8)                                  | 188,939 (28.6) | 407,221 (27.6) | 827,379 (27.9)   | 1,251,073 (28.3) | 696,286 (29.2)   | 13,555 (26.2) | 3,398,382 (28.3) |
| 65-74                                      | 6,027 (12.9)                                   | 75,225 (11.4)  | 167,328 (11.3) | 337,959 (11.4)   | 480,164 (10.9)   | 250,916 (10.5)   | 4,995 (9.7)   | 1,322,614 (11.0) |
| ≥75                                        | 5,401 (11.6)                                   | 58,072 (8.8)   | 134,938 (9.1)  | 258,373 (8.7)    | 363,739 (8.2)    | 182,826 (7.7)    | 3,516 (6.8)   | 1,006,865 (8.4)  |
| <b>Sex</b>                                 |                                                |                |                |                  |                  |                  |               |                  |
| Female                                     | 21,331 (45.6)                                  | 321,021 (48.5) | 741,288 (50.2) | 1,536,715 (51.8) | 2,352,148 (53.2) | 1,245,292 (52.2) | 27,910 (54.0) | 6,245,705 (52.0) |
| Male                                       | 25,416 (54.4)                                  | 340,740 (51.5) | 735,428 (49.8) | 1,429,579 (48.2) | 2,070,338 (46.8) | 1,141,057 (47.8) | 23,758 (46.0) | 5,766,316 (48.0) |
| <b>Neighbourhood-level income quintile</b> |                                                |                |                |                  |                  |                  |               |                  |
| 1 (lowest)                                 | 10,563 (22.6)                                  | 158,908 (24.0) | 304,381 (20.6) | 531,181 (17.9)   | 736,255 (16.6)   | 447,800 (18.8)   | 15,183 (29.4) | 2,204,271 (18.4) |
| 2                                          | 9,165 (19.6)                                   | 141,667 (21.4) | 300,837 (20.4) | 567,104 (19.1)   | 825,310 (18.7)   | 470,882 (19.7)   | 11,060 (21.4) | 2,326,025 (19.4) |
| 3                                          | 8,990 (19.2)                                   | 135,671 (20.5) | 308,776 (20.9) | 611,370 (20.6)   | 895,940 (20.3)   | 487,454 (20.4)   | 9,859 (19.1)  | 2,458,060 (20.5) |
| 4                                          | 9,589 (20.5)                                   | 121,326 (18.3) | 294,905 (20.0) | 631,854 (21.3)   | 947,742 (21.4)   | 490,899 (20.6)   | 7,797 (15.1)  | 2,504,112 (20.8) |
| 5 (highest)                                | 8,194 (17.5)                                   | 102,309 (15.5) | 264,254 (17.9) | 617,078 (20.8)   | 1,006,194 (22.8) | 483,467 (20.3)   | 7,648 (14.8)  | 2,489,144 (20.7) |
| Missing                                    | 246 (0.5)                                      | 1,880 (0.3)    | 3,563 (0.2)    | 7,707 (0.3)      | 11,045 (0.2)     | 5,847 (0.2)      | 121 (0.2)     | 30,409 (0.3)     |
| <b>Material Deprivation quintile</b>       |                                                |                |                |                  |                  |                  |               |                  |
| 1 (least deprived)                         | 10,154 (21.7)                                  | 110,985 (16.8) | 281,815 (19.1) | 687,175 (23.2)   | 1,184,049 (26.8) | 577,501 (24.2)   | 10,814 (20.9) | 79,839 (0.7)     |
| 2                                          | 8,765 (18.7)                                   | 123,833 (18.7) | 301,672 (20.4) | 646,076 (21.8)   | 980,348 (22.2)   | 511,812 (21.4)   | 8,416 (16.3)  | 2,862,493 (23.8) |
| 3                                          | 8,331 (17.8)                                   | 124,415 (18.8) | 296,005 (20.0) | 568,649 (19.2)   | 826,842 (18.7)   | 453,413 (19.0)   | 9,163 (17.7)  | 2,580,922 (21.5) |
| 4                                          | 8,651 (18.5)                                   | 134,756 (20.4) | 290,618 (19.7) | 528,426 (17.8)   | 721,805 (16.3)   | 421,322 (17.7)   | 9,757 (18.9)  | 2,286,818 (19.0) |
| 5 (most deprived)                          | 9,446 (20.2)                                   | 160,018 (24.2) | 295,382 (20.0) | 512,930 (17.3)   | 684,187 (15.5)   | 411,430 (17.2)   | 13,221 (25.6) | 2,115,335 (17.6) |
| Missing                                    | 1,400 (3.0)                                    | 7,754 (1.2)    | 11,224 (0.8)   | 23,038 (0.8)     | 25,255 (0.6)     | 10,871 (0.5)     | 297 (0.6)     | 2,086,614 (17.4) |
| <b>Ethnic Diversity quintile</b>           |                                                |                |                |                  |                  |                  |               |                  |
| 1 (least diverse)                          | 7,156 (15.3)                                   | 115,340 (17.4) | 292,122 (19.8) | 552,978 (18.6)   | 558,944 (12.6)   | 186,743 (7.8)    | 4,143 (8.0)   | 79,839 (0.7)     |
| 2                                          | 7,169 (15.3)                                   | 116,771 (17.6) | 285,005 (19.3) | 576,798 (19.4)   | 682,543 (15.4)   | 256,267 (10.7)   | 4,099 (7.9)   | 1,717,426 (14.3) |
| 3                                          | 8,341 (17.8)                                   | 109,844 (16.6) | 250,549 (17.0) | 559,715 (18.9)   | 823,205 (18.6)   | 385,319 (16.1)   | 7,750 (15.0)  | 1,928,652 (16.1) |
| 4                                          | 10,814 (23.1)                                  | 126,308 (19.1) | 259,401 (17.6) | 578,766 (19.5)   | 1,017,812 (23.0) | 567,822 (23.8)   | 12,563 (24.3) | 2,144,723 (17.9) |
| 5 (most diverse)                           | 11,867 (25.4)                                  | 185,744 (28.1) | 378,415 (25.6) | 674,999 (22.8)   | 1,314,727 (29.7) | 979,327 (41.0)   | 22,816 (44.2) | 2,573,486 (21.4) |

|                                                 |               |                |                  |                  |                  |                  |               |                  |
|-------------------------------------------------|---------------|----------------|------------------|------------------|------------------|------------------|---------------|------------------|
| Missing                                         | 1,400 (3.0)   | 7,754 (1.2)    | 11,224 (0.8)     | 23,038 (0.8)     | 25,255 (0.6)     | 10,871 (0.5)     | 297 (0.6)     | 3,567,895 (29.7) |
| <b>Recent Registrant (&lt;10 years)</b>         |               |                |                  |                  |                  |                  |               |                  |
| Yes                                             | 2,837 (6.1)   | 64,105 (9.7)   | 133,551 (9.0)    | 218,543 (7.4)    | 385,788 (8.7)    | 252,241 (10.6)   | 6,906 (13.4)  | 1,063,971 (8.9)  |
| No                                              | 40,843 (87.4) | 535,101 (80.9) | 1,190,507 (80.6) | 2,433,106 (82.0) | 3,595,887 (81.3) | 1,929,755 (80.9) | 40,066 (77.5) | 9,765,265 (81.3) |
| Missing                                         | 3,067 (6.6)   | 62,555 (9.5)   | 152,658 (10.3)   | 314,645 (10.6)   | 440,811 (10.0)   | 204,353 (8.6)    | 4,696 (9.1)   | 1,182,785 (9.8)  |
| <b>Morbidity (Resource Utilization Band)</b>    |               |                |                  |                  |                  |                  |               |                  |
| 0 (non-user)                                    | 3,042 (6.5)   | 53,011 (8.0)   | 116,461 (7.9)    | 249,471 (8.4)    | 360,035 (8.1)    | 194,220 (8.1)    | 3,361 (6.5)   | 979,601 (8.2)    |
| 1                                               | 2,626 (5.6)   | 44,215 (6.7)   | 96,865 (6.6)     | 188,203 (6.3)    | 265,028 (6.0)    | 137,891 (5.8)    | 3,150 (6.1)   | 737,978 (6.1)    |
| 2                                               | 9,685 (20.7)  | 142,365 (21.5) | 318,821 (21.6)   | 629,548 (21.2)   | 918,005 (20.8)   | 480,722 (20.1)   | 10,875 (21.0) | 2,510,021 (20.9) |
| 3                                               | 22,524 (48.2) | 308,709 (46.6) | 683,961 (46.3)   | 1,368,890 (46.1) | 2,085,460 (47.2) | 1,148,901 (48.1) | 25,066 (48.5) | 5,643,511 (47.0) |
| 4                                               | 5,898 (12.6)  | 80,837 (12.2)  | 186,546 (12.6)   | 380,537 (12.8)   | 579,236 (13.1)   | 312,847 (13.1)   | 6,868 (13.3)  | 1,552,769 (12.9) |
| 5 (highest user)                                | 2,972 (6.4)   | 32,624 (4.9)   | 74,062 (5.0)     | 149,645 (5.0)    | 214,722 (4.9)    | 111,768 (4.7)    | 2,348 (4.5)   | 588,141 (4.9)    |
| <b>Co-Morbidity (Adjusted Diagnoses Groups)</b> |               |                |                  |                  |                  |                  |               |                  |
| 0                                               | 3,058 (6.5)   | 53,201 (8.0)   | 116,978 (7.9)    | 250,775 (8.5)    | 361,757 (8.2)    | 194,831 (8.2)    | 3,366 (6.5)   | 983,966 (8.2)    |
| 1-4                                             | 24,958 (53.4) | 337,144 (50.9) | 753,137 (51.0)   | 1,488,427 (50.2) | 2,161,033 (48.9) | 1,136,125 (47.6) | 25,142 (48.7) | 5,925,966 (49.3) |
| 5-9                                             | 14,917 (31.9) | 220,459 (33.3) | 493,326 (33.4)   | 999,668 (33.7)   | 1,540,214 (34.8) | 849,104 (35.6)   | 18,600 (36.0) | 4,136,288 (34.4) |
| ≥ 10                                            | 3,814 (8.2)   | 50,957 (7.7)   | 113,275 (7.7)    | 227,424 (7.7)    | 359,482 (8.1)    | 206,289 (8.6)    | 4,560 (8.8)   | 965,801 (8.0)    |
| <b>Chronic Conditions</b>                       |               |                |                  |                  |                  |                  |               |                  |
| Hypertension                                    | 13,146 (28.1) | 161,768 (24.4) | 350,579 (23.7)   | 676,513 (22.8)   | 972,746 (22.0)   | 525,617 (22.0)   | 10,873 (21.0) | 2,711,242 (22.6) |
| DM                                              | 6,821 (14.6)  | 82,520 (12.5)  | 175,651 (11.9)   | 330,527 (11.1)   | 478,984 (10.8)   | 273,799 (11.5)   | 5,977 (11.6)  | 1,354,279 (11.3) |
| CHF                                             | 1,978 (4.2)   | 13,945 (2.1)   | 31,544 (2.1)     | 59,835 (2.0)     | 79,818 (1.8)     | 39,321 (1.6)     | 820 (1.6)     | 227,261 (1.9)    |
| AMI                                             | 714 (1.5)     | 8,019 (1.2)    | 17,897 (1.2)     | 34,266 (1.2)     | 44,602 (1.0)     | 21,978 (0.9)     | 401 (0.8)     | 127,877 (1.1)    |
| Asthma                                          | 7,405 (15.8)  | 102,415 (15.5) | 226,508 (15.3)   | 452,736 (15.3)   | 690,691 (15.6)   | 375,572 (15.7)   | 8,202 (15.9)  | 1,863,529 (15.5) |
| COPD                                            | 3,865 (8.3)   | 48,970 (7.4)   | 111,406 (7.5)    | 210,552 (7.1)    | 266,783 (6.0)    | 131,864 (5.5)    | 2,725 (5.3)   | 776,165 (6.5)    |
| Mental health                                   | 11,249 (24.1) | 131,914 (19.9) | 302,105 (20.5)   | 611,709 (20.6)   | 946,647 (21.4)   | 515,357 (21.6)   | 12,559 (24.3) | 2,531,540 (21.1) |
| <b>Rurality</b>                                 |               |                |                  |                  |                  |                  |               |                  |
| Big cities                                      | 20,502 (43.9) | 261,133 (39.5) | 513,917 (34.8)   | 1,065,398 (35.9) | 1,951,424 (44.1) | 1,196,905 (50.2) | 32,308 (62.5) | 5,041,587 (42.0) |
| Small cities                                    | 13,519 (28.9) | 201,308 (30.4) | 421,487 (28.5)   | 907,415 (30.6)   | 1,485,352 (33.6) | 833,369 (34.9)   | 12,408 (24.0) | 3,874,858 (32.3) |
| Small towns                                     | 7,545 (16.1)  | 148,806 (22.5) | 389,245 (26.4)   | 727,505 (24.5)   | 746,817 (16.9)   | 279,701 (11.7)   | 3,510 (6.8)   | 2,303,129 (19.2) |
| Rural                                           | 5,181 (11.1)  | 50,514 (7.6)   | 152,067 (10.3)   | 265,976 (9.0)    | 238,893 (5.4)    | 76,374 (3.2)     | 3,442 (6.7)   | 792,447 (6.6)    |

**eAppendix 11.** Health Service Utilization of Patients Attached to Comprehensive Family Physicians Stratified by the Attached Physician's Percent of Care Provided Virtually, between February 1 and October 2021, in Ontario Canada.

| Physician % Virtual Care                                               | 0%                   | >0-20%               | >20-40%              | >40-60%              | >60-80%              | >80-<100%            | 100%                | Total                |
|------------------------------------------------------------------------|----------------------|----------------------|----------------------|----------------------|----------------------|----------------------|---------------------|----------------------|
| <b>No. Patients</b>                                                    | N=46,747             | N=661,761            | N=1,476,716          | N=2,966,294          | N=4,422,486          | N=2,386,349          | N=51,668            | N=12,125,959         |
| <b>Primary Care Services</b>                                           |                      |                      |                      |                      |                      |                      |                     |                      |
| Any primary care visit, n (%)                                          | 26,862 (57.5)        | 411,991 (62.3)       | 921,775 (62.4)       | 1,858,118 (62.6)     | 2,855,323 (64.6)     | 1,569,605 (65.8)     | 32,277 (62.5)       | 7,675,951 (63.9)     |
| Number of primary care visits per patient, mean ± SD                   | 2.3 ± 4.0            | 2.4 ± 3.9            | 2.4 ± 3.8            | 2.3 ± 3.6            | 2.6 ± 3.8            | 2.9 ± 4.2            | 2.8 ± 4.5           | 2.5 ± 3.9            |
| Percent of visits with usual family physician <sup>a</sup> , mean ± SD | 53.3 ± 45.2          | 67.7 ± 39.8          | 70.3 ± 38.1          | 71.7 ± 36.8          | 71.8 ± 36.6          | 68.2 ± 38.8          | 40.0 ± 43.0         | 70.4 ± 37.6          |
| <b>Other Health Care Use</b>                                           |                      |                      |                      |                      |                      |                      |                     |                      |
| Any specialist visits, n (%)                                           | 18,601 (39.8)        | 249,150 (37.6)       | 563,324 (38.1)       | 1,150,948 (38.8)     | 1,763,140 (39.9)     | 959,637 (40.2)       | 20,368 (39.4)       | 4,725,168 (39.3)     |
| Ambulatory care-sensitive condition visits, n (%)                      | 164 (0.4)            | 1,734 (0.3)          | 3,675 (0.2)          | 6,968 (0.2)          | 9,030 (0.2)          | 4,393 (0.2)          | 91 (0.2)            | 26,055 (0.2)         |
| <b>Emergency Department Utilization, February to October 2019/2021</b> |                      |                      |                      |                      |                      |                      |                     |                      |
| Total visits per 1,000, 2021, mean ± SD <sup>b</sup>                   | 348.0 ± 1204.0       | 287.2 ± 981.7        | 282.4 ± 1005.9       | 274.7 ± 893.5        | 248.9 ± 810.0        | 238.0 ± 780.5        | 262.1 ± 972.0       | 259.8 ± 864.4        |
| Total visits per 1,000, 2019, mean ± SD <sup>b</sup>                   | 387.9 ± 1293.1       | 335.5 ± 1023.4       | 330.3 ± 959.2        | 317.4 ± 945.7        | 284.1 ± 911.7        | 268.7 ± 828.6        | 282.2 ± 853.4       | 298.4 ± 920.0        |
| Absolute difference 2021 vs 2019 (95% CI)                              | -39.9 (-54.3, -25.6) | -48.3 (-51.8, -44.9) | -47.9 (-50.2, -45.6) | -42.7 (-44.2, -41.2) | -35.2 (-36.4, -34.0) | -30.8 (-32.3, -29.3) | -20.0 (-30.2, -9.9) | -38.6 (-39.3, -37.9) |
| Percent change 2021 vs 2019 (95% CI)                                   | -10.3 (-13.8, -6.8)  | -14.4 (-15.4, -13.4) | -14.5 (-15.2, -13.9) | -13.5 (-13.9, -13.0) | -12.4 (-12.8, -12.0) | -11.5 (-12.0, -10.9) | -7.1 (-10.7, -3.5)  | -12.9 (-13.2, -12.7) |

<sup>a</sup> Among patients with 2 or more visits between February and October 2021

<sup>b</sup> This includes only patients whose attached physicians had claims in both 2021 and 2019.

Abbreviations: SD, standard deviation; CI, confidence interval
