# Supplementary material for: Virtual Care and Emergency Department Use During the COVID-19 Pandemic Among Patients of Family Physicians in Ontario, Canada
Source: PubMed Central journal article supplement (PMC10148195; doi:10.1001/jamanetworkopen.2023.9602), 2023-04-28
Supplement: jamanetwopen-e239602-s002.pdf [file jamanetwopen-e239602-s002.pdf]

## Data Sharing Statement

Kiran. Virtual Care and Emergency Department Use During the COVID-19 Pandemic Among Patients of Family Physicians in Ontario, Canada. *JAMA Netw Open*. Published April 28, 2023. doi:10.1001/jamanetworkopen.2023.9602

### Data

**Data available:** No

### Additional Information

**Explanation for why data not available:** The data sets from this study are held securely in coded form at ICES. Data-sharing agreements prohibit ICES from making the data sets publicly available, but access may be granted to those who meet pre-specified criteria for confidential access, available at [www.ices.on.ca/DAS](http://www.ices.on.ca/DAS). The complete data set creation plan, and underlying analytic code are available from the authors upon request, understanding that the programs may rely upon coding templates or macros unique to ICES.
